# Supplementary material for: Phase separation in ceramide[NP] containing lipid model membranes: neutron diffraction and solid-state NMR
Source: Royal Society of Chemistry journal article supplement (doi:10.1039/c6sm02356h), 2017-01-01
Supplement: c6sm02356h1.pdf [file c6sm02356h1.pdf]

### Supporting Information:

#### Phase separation in Ceramide [NP] containing lipid model membranes: Neutron diffraction and solid-state NMR

Annett Schroeter<sup>1</sup>, Sören Stahlberg<sup>2</sup>, Barbora Školová<sup>2,3</sup>, Stefan Sonnenberger<sup>1</sup>, Adina Eichner<sup>1</sup>, Daniel Huster<sup>2</sup>, Kateřina Vávrová<sup>3</sup>, Thomas Hauß<sup>4</sup>, Bodo Dobner<sup>1</sup>, Reinhard H.H. Neubert<sup>1,5</sup>, Alexander Vogel<sup>2</sup>

<sup>1</sup> Institute of Pharmacy, Martin Luther University Halle-Wittenberg, Halle (Saale), Germany

<sup>2</sup> Institute for Medical Physics and Biophysics, University of Leipzig, Germany

<sup>3</sup> Faculty of Pharmacy, Charles University in Prague, Heyrovského 1203, 50005 Hradec Králové, Czech Republic

<sup>4</sup> Institute of Soft Matter and Functional Materials, Helmholtz-Zentrum für Materialien und Energie, Berlin, Germany

<sup>5</sup> Institute of Applied Dermatopharmacy at the Martin Luther University Halle-Wittenberg, Halle (Saale), Germany

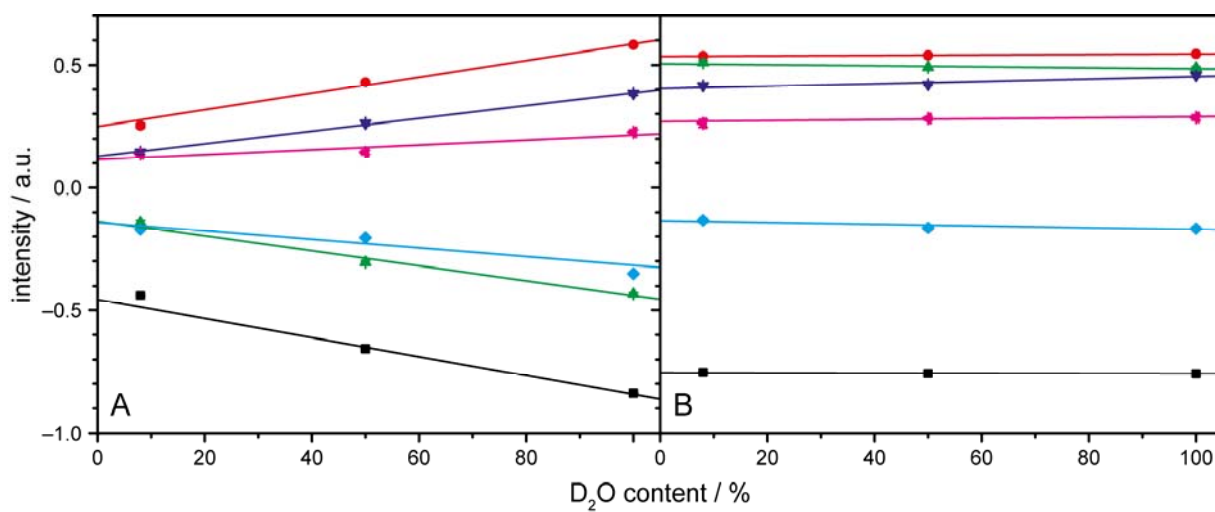

**Fig. S1** Dependence of the structure factors of PhA (A) and PhB (B) of the model membrane composed of CER[NP]-C24/CHOL/TA (1:1:1 mol/mol) on the D<sub>2</sub>O content at 32°C and 57% RH. Data is shown for orders 1 (black), 2 (red), 3 (green), 4 (dark blue), 5 (light blue) and 6 (pink).

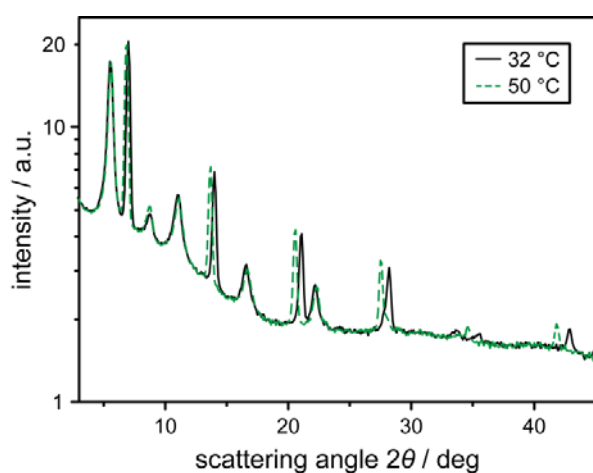

**Fig. S2** Comparison of the neutron diffraction pattern of the model membrane composed of CER[NP]-C24/CHOL/TA (1:1:1 mol/mol) measured at 32°C (black solid line) with the pattern of the same sample at 50°C (dashed green line) measured at 100% D<sub>2</sub>O.

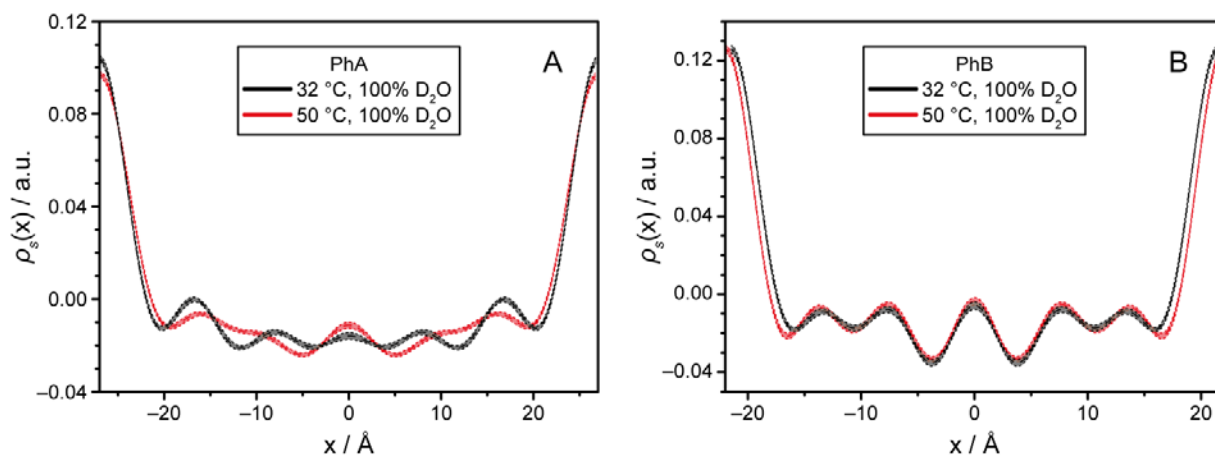

**Fig. S3** Comparison of the NSLD profiles of PhA (A) and PhB (B) of the model membrane composed of CER[NP]-C24/CHOL/TA (1:1:1 mol/mol) at 50°C and 32°C. All profiles were determined at 57% RH and 100% D<sub>2</sub>O.

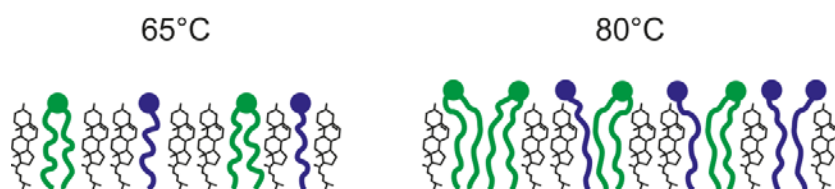

**Fig. S4** Cartoon representation of the liquid-crystalline phase observed in the NMR spectra at 65°C and 80°C. At 65°C large portions of CER[NP] and TA are still in a crystalline phase. Therefore, the liquid-crystalline phase has a very high CHOL concentration and the few CER[NP] and TA molecules present adapt their length to CHOL. As the crystalline phase almost completely vanishes at 80°C more CER[NP] and TA molecules are added to the liquid-crystalline phase reducing the cholesterol concentration. Therefore, the influence of CHOL on the other molecules is reduced and leads to an increase in their order.
